# Supplementary material for: Transcriptome and Differentially Expressed Gene Profiles in Mycelium, Primordium and Fruiting Body Development in Stropharia rugosoannulata
Source: MDPI journal article supplement (doi:10.3390/genes13061080), 2022-06-17
Supplement: s1 [file s1]

### Supplementary Tables

**Supplementary Table S1** Summary of the sequencing data of the *S. rugosoannulata* transcriptome at different growth stages.

| Sample | Raw reads | clean reads | Total_Bases | Q20%  | Q30%  | GC%   | mapped-reads | mapped-rate (%) |
|--------|-----------|-------------|-------------|-------|-------|-------|--------------|-----------------|
| G-S-1  | 53243010  | 50516336    | 7.55E+09    | 98.28 | 94.37 | 54.48 | 49790461     | 94.75           |
| G-S-2  | 81198788  | 76729644    | 1.15E+10    | 98.22 | 94.21 | 54.93 | 45041716     | 94.6            |
| G-S-3  | 60501562  | 56967112    | 8.51E+09    | 98.33 | 94.51 | 54.54 | 47837984     | 93.35           |
| P-S-1  | 67368950  | 63586950    | 9.5E+09     | 98.27 | 94.35 | 53.17 | 47647008     | 94.32           |
| P-S-2  | 56544080  | 53295508    | 7.96E+09    | 98.3  | 94.4  | 53.6  | 71228128     | 92.83           |
| P-S-3  | 57151492  | 54162064    | 8.09E+09    | 98.35 | 94.56 | 53.39 | 52210358     | 91.65           |
| M-F-1  | 69871086  | 65825934    | 9.83E+09    | 98.2  | 94.16 | 53.48 | 59606406     | 93.74           |
| M-F-2  | 56383966  | 53380648    | 7.98E+09    | 98.38 | 94.64 | 53.68 | 50337607     | 94.45           |
| M-F-3  | 56731970  | 53847518    | 8.05E+09    | 98.39 | 94.67 | 53.54 | 50468211     | 93.18           |

**Supplementary Table S2** GO functional classification of differentially expressed genes.

| G-S VS P-S |                |              |               |       |                                                      |                    |
|------------|----------------|--------------|---------------|-------|------------------------------------------------------|--------------------|
| id         | ratio_in_study | ratio_in_pop | p_uncorrected | p_fdr | description                                          | namespace          |
| GO:0019748 | 73/2969        | 153/11495    | 1.47E-06      | 0.004 | secondary metabolic process                          | biological_process |
| GO:0000272 | 54/2969        | 107/11495    | 1.95E-06      | 0.004 | polysaccharide catabolic process                     | biological_process |
| GO:0016798 | 80/2969        | 184/11495    | 2.27E-06      | 0.004 | hydrolase activity, acting on glycosyl bonds         | molecular_function |
| GO:0004553 | 78/2969        | 166/11495    | 2.50E-06      | 0.004 | hydrolase activity, hydrolyzing O-glycosyl compounds | molecular_function |
| GO:0044550 | 62/2969        | 131/11495    | 2.62E-06      | 0.004 | secondary metabolite biosynthetic process            | biological_process |
| GO:0005576 | 103/2969       | 230/11495    | 2.79E-06      | 0.004 | extracellular region                                 | cellular_component |
| GO:0009404 | 34/2969        | 63/11495     | 3.40E-06      | 0.004 | toxin metabolic process                              | biological_process |
| GO:0043386 | 28/2969        | 49/11495     | 3.62E-06      | 0.004 | mycotoxin biosynthetic process                       | biological_process |
| GO:0044283 | 198/2969       | 567/11495    | 5.59E-06      | 0.006 | small molecule biosynthetic process                  | biological_process |
| GO:0043385 | 28/2969        | 50/11495     | 5.80E-06      | 0.008 | mycotoxin metabolic process                          | biological_process |
| GO:0044281 | 391/2969       | 1168/11495   | 6.18E-06      | 0.008 | small molecule metabolic process                     | biological_process |
| GO:1901136 | 30/2969        | 55/11495     | 6.70E-06      | 0.008 | carbohydrate derivative catabolic process            | biological_process |
| GO:0016787 | 543/2969       | 1691/11495   | 7.26E-06      | 0.008 | hydrolase activity                                   | molecular_function |
| GO:1901135 | 174/2969       | 499/11495    | 8.15E-06      | 0.01  | carbohydrate derivative metabolic process            | biological_process |
| GO:0008152 | 1515/2969      | 5199/11495   | 9.31E-06      | 0.01  | metabolic process                                    | biological_process |
| GO:0017144 | 147/2969       | 412/11495    | 9.39E-06      | 0.01  | drug metabolic process                               | biological_process |
| GO:0003824 | 1158/2969      | 3837/11495   | 9.41E-06      | 0.01  | catalytic activity                                   | molecular_function |
| GO:0003674 | 1746/2969      | 6261/11495   | 9.42E-06      | 0.01  | molecular_function                                   | molecular_function |
| GO:0071704 | 1384/2969      | 4817/11495   | 1.05E-05      | 0.01  | organic substance metabolic process                  | biological_process |

|                   |           |            |          |       |                                                            |                    |
|-------------------|-----------|------------|----------|-------|------------------------------------------------------------|--------------------|
| GO:0008150        | 1958/2969 | 6964/11495 | 1.05E-05 | 0.01  | biological_process                                         | biological_process |
| GO:0044237        | 1384/2969 | 4829/11495 | 1.06E-05 | 0.01  | cellular metabolic process                                 | biological_process |
| GO:0009403        | 29/2969   | 54/11495   | 1.32E-05 | 0.012 | toxin biosynthetic process                                 | biological_process |
| GO:0009987        | 1682/2969 | 6084/11495 | 1.33E-05 | 0.012 | cellular process                                           | biological_process |
| GO:1901378        | 24/2969   | 41/11495   | 1.38E-05 | 0.012 | organic heteropentacyclic compound<br>biosynthetic process | biological_process |
| GO:1901376        | 24/2969   | 41/11495   | 1.38E-05 | 0.012 | organic heteropentacyclic compound metabolic<br>process    | biological_process |
| GO:1901657        | 39/2969   | 81/11495   | 1.69E-05 | 0.018 | glycosyl compound metabolic process                        | biological_process |
| GO:1903825        | 51/2969   | 116/11495  | 2.41E-05 | 0.03  | organic acid transmembrane transport                       | biological_process |
| GO:0044238        | 1246/2969 | 4443/11495 | 2.91E-05 | 0.04  | primary metabolic process                                  | biological_process |
| GO:0042180        | 32/2969   | 63/11495   | 3.10E-05 | 0.044 | cellular ketone metabolic process                          | biological_process |
| GO:0016836        | 26/2969   | 48/11495   | 3.64E-05 | 0.046 | hydro-lyase activity                                       | molecular_function |
| <b>M-F VS P-S</b> |           |            |          |       |                                                            |                    |
| GO:0015935        | 43/3287   | 63/11495   | 7.39E-07 | 0     | small ribosomal subunit                                    | cellular_component |
| GO:0022627        | 33/3287   | 48/11495   | 1.11E-06 | 0     | cytosolic small ribosomal subunit                          | cellular_component |
| GO:0098800        | 48/3287   | 76/11495   | 1.21E-06 | 0.002 | inner mitochondrial membrane protein complex               | cellular_component |
| GO:0000313        | 34/3287   | 52/11495   | 1.26E-06 | 0.002 | organellar ribosome                                        | cellular_component |
| GO:0005761        | 34/3287   | 52/11495   | 1.26E-06 | 0.002 | mitochondrial ribosome                                     | cellular_component |
| GO:0015934        | 67/3287   | 113/11495  | 1.61E-06 | 0.002 | large ribosomal subunit                                    | cellular_component |
| GO:0022625        | 46/3287   | 78/11495   | 1.71E-06 | 0.002 | cytosolic large ribosomal subunit                          | cellular_component |
| GO:0044391        | 109/3287  | 175/11495  | 1.75E-06 | 0.002 | ribosomal subunit                                          | cellular_component |
| GO:0098798        | 102/3287  | 195/11495  | 1.87E-06 | 0.002 | mitochondrial protein complex                              | cellular_component |
| GO:0005840        | 119/3287  | 209/11495  | 1.94E-06 | 0.002 | ribosome                                                   | cellular_component |
| GO:0140013        | 79/3287   | 164/11495  | 1.94E-06 | 0.002 | meiotic nuclear division                                   | biological_process |

|                   |          |           |          |       |                                                      |                    |
|-------------------|----------|-----------|----------|-------|------------------------------------------------------|--------------------|
| GO:0003735        | 100/3287 | 154/11495 | 2.20E-06 | 0.002 | structural constituent of ribosome                   | molecular_function |
| GO:0061982        | 73/3287  | 154/11495 | 2.20E-06 | 0.002 | meiosis I cell cycle process                         | biological_process |
| GO:0006261        | 93/3287  | 199/11495 | 2.42E-06 | 0.002 | DNA-dependent DNA replication                        | biological_process |
| GO:0051785        | 59/3287  | 116/11495 | 2.42E-06 | 0.002 | positive regulation of nuclear division              | biological_process |
| GO:0006310        | 94/3287  | 207/11495 | 2.55E-06 | 0.002 | DNA recombination                                    | biological_process |
| GO:0022626        | 80/3287  | 139/11495 | 2.62E-06 | 0.002 | cytosolic ribosome                                   | cellular_component |
| GO:0007127        | 67/3287  | 139/11495 | 2.62E-06 | 0.002 | meiosis I                                            | biological_process |
| GO:0005759        | 109/3287 | 237/11495 | 2.86E-06 | 0.002 | mitochondrial matrix                                 | cellular_component |
| GO:0005198        | 165/3287 | 320/11495 | 3.03E-06 | 0.002 | structural molecule activity                         | molecular_function |
| GO:1902600        | 39/3287  | 69/11495  | 3.05E-06 | 0.002 | proton transmembrane transport                       | biological_process |
| GO:0000280        | 130/3287 | 286/11495 | 3.11E-06 | 0.002 | nuclear division                                     | biological_process |
| GO:0006839        | 124/3287 | 286/11495 | 3.11E-06 | 0.002 | mitochondrial transport                              | biological_process |
| GO:0000819        | 91/3287  | 203/11495 | 3.11E-06 | 0.002 | sister chromatid segregation                         | biological_process |
| GO:0048285        | 135/3287 | 303/11495 | 3.12E-06 | 0.002 | organelle fission                                    | biological_process |
| GO:0007059        | 126/3287 | 287/11495 | 3.13E-06 | 0.002 | chromosome segregation                               | biological_process |
| GO:1990542        | 115/3287 | 255/11495 | 3.19E-06 | 0.002 | mitochondrial transmembrane transport                | biological_process |
| GO:0032543        | 51/3287  | 100/11495 | 3.22E-06 | 0.002 | mitochondrial translation                            | biological_process |
| GO:0043604        | 214/3287 | 529/11495 | 3.36E-06 | 0.002 | amide biosynthetic process                           | biological_process |
| GO:0006260        | 95/3287  | 205/11495 | 3.37E-06 | 0.002 | DNA replication                                      | biological_process |
| GO:0009100        | 69/3843  | 132/11495 | 9.93E-06 | 0.004 | glycoprotein metabolic process                       | biological_process |
| <b>M-F VS G-S</b> |          |           |          |       |                                                      |                    |
| GO:0004553        | 84/3434  | 166/11495 | 1.96E-06 | 0     | hydrolase activity, hydrolyzing O-glycosyl compounds | molecular_function |
| GO:0005576        | 112/3434 | 230/11495 | 2.76E-06 | 0     | extracellular region                                 | cellular_component |
| GO:0006302        | 104/3434 | 232/11495 | 2.90E-06 | 0     | double-strand break repair                           | biological_process |

|            |          |            |          |       |                                              |                    |
|------------|----------|------------|----------|-------|----------------------------------------------|--------------------|
| GO:0016798 | 93/3434  | 184/11495  | 2.92E-06 | 0     | hydrolase activity, acting on glycosyl bonds | molecular_function |
| GO:0016054 | 65/3434  | 121/11495  | 2.98E-06 | 0     | organic acid catabolic process               | biological_process |
| GO:0046395 | 65/3434  | 121/11495  | 2.98E-06 | 0     | carboxylic acid catabolic process            | biological_process |
| GO:0007059 | 129/3434 | 287/11495  | 3.03E-06 | 0     | chromosome segregation                       | biological_process |
| GO:0040020 | 39/3434  | 68/11495   | 3.11E-06 | 0     | regulation of meiotic nuclear division       | biological_process |
| GO:0005975 | 169/3434 | 406/11495  | 3.18E-06 | 0     | carbohydrate metabolic process               | biological_process |
| GO:0006261 | 92/3434  | 199/11495  | 3.32E-06 | 0     | DNA-dependent DNA replication                | biological_process |
| GO:0044282 | 95/3434  | 206/11495  | 3.33E-06 | 0     | small molecule catabolic process             | biological_process |
| GO:0000793 | 55/3434  | 107/11495  | 3.37E-06 | 0     | condensed chromosome                         | cellular_component |
| GO:0000272 | 56/3434  | 107/11495  | 3.37E-06 | 0     | polysaccharide catabolic process             | biological_process |
| GO:0104004 | 101/3434 | 224/11495  | 4.18E-06 | 0     | cellular response to environmental stimulus  | biological_process |
| GO:0071214 | 101/3434 | 224/11495  | 4.18E-06 | 0     | cellular response to abiotic stimulus        | biological_process |
| GO:0016491 | 275/3434 | 667/11495  | 4.51E-06 | 0     | oxidoreductase activity                      | molecular_function |
| GO:0034220 | 215/3434 | 542/11495  | 4.60E-06 | 0.002 | ion transmembrane transport                  | biological_process |
| GO:0006260 | 93/3434  | 205/11495  | 4.75E-06 | 0.002 | DNA replication                              | biological_process |
| GO:0005976 | 99/3434  | 221/11495  | 5.02E-06 | 0.002 | polysaccharide metabolic process             | biological_process |
| GO:0006310 | 93/3434  | 207/11495  | 5.04E-06 | 0.002 | DNA recombination                            | biological_process |
| GO:0034312 | 16/3434  | 20/11495   | 5.12E-06 | 0.002 | diol biosynthetic process                    | biological_process |
| GO:0034311 | 16/3434  | 20/11495   | 5.12E-06 | 0.002 | diol metabolic process                       | biological_process |
| GO:0051186 | 148/3434 | 355/11495  | 5.17E-06 | 0.002 | cofactor metabolic process                   | biological_process |
| GO:0098656 | 145/3434 | 346/11495  | 5.20E-06 | 0.002 | anion transmembrane transport                | biological_process |
| GO:0055114 | 332/3434 | 822/11495  | 5.25E-06 | 0.002 | oxidation-reduction process                  | biological_process |
| GO:0006811 | 247/3434 | 641/11495  | 5.58E-06 | 0.004 | ion transport                                | biological_process |
| GO:0044281 | 435/3434 | 1168/11495 | 6.07E-06 | 0.006 | small molecule metabolic process             | biological_process |
| GO:0022857 | 241/3434 | 620/11495  | 6.11E-06 | 0.006 | transmembrane transporter activity           | molecular_function |

|            |          |           |          |       |                              |                    |
|------------|----------|-----------|----------|-------|------------------------------|--------------------|
| GO:0006855 | 108/3434 | 248/11495 | 6.22E-06 | 0.006 | drug transmembrane transport | biological_process |
| GO:0044427 | 278/3434 | 738/11495 | 6.80E-06 | 0.006 | chromosomal part             | cellular_component |

**Supplementary Table S3** KEGG pathway enrichment analysis of differentially expressed genes.

| G-S VS P-S    |                                                  |                                                            |         |              |                   |          |          |
|---------------|--------------------------------------------------|------------------------------------------------------------|---------|--------------|-------------------|----------|----------|
| layer1        | layer2                                           | layer3                                                     | ID      | Input.number | Background.number | pvalue   | FDR      |
| 1. Metabolism | 1.10 Biosynthesis of other secondary metabolites | Phenylpropanoid biosynthesis                               | ko00940 | 10           | 13                | 0.000295 | 0.101523 |
| 1. Metabolism | 1.0 Global and overview maps                     | Metabolic pathways                                         | ko01100 | 277          | 857               | 0.000569 | 0.097806 |
| 1. Metabolism | 1.6 Metabolism of other amino acids              | Cyanoamino acid metabolism                                 | ko00460 | 11           | 16                | 0.000691 | 0.079208 |
| 1. Metabolism | 1.11 Xenobiotics biodegradation and metabolism   | Metabolism of xenobiotics by cytochrome P450               | ko00980 | 10           | 15                | 0.001759 | 0.100822 |
| 1. Metabolism | 1.11 Xenobiotics biodegradation and metabolism   | Polycyclic aromatic hydrocarbon degradation                | ko00624 | 10           | 16                | 0.003538 | 0.15214  |
| 1. Metabolism | 1.11 Xenobiotics biodegradation and metabolism   | Dioxin degradation                                         | ko00621 | 10           | 16                | 0.003538 | 0.135235 |
| 1. Metabolism | 1.11 Xenobiotics biodegradation and metabolism   | Naphthalene degradation                                    | ko00626 | 11           | 19                | 0.005096 | 0.175306 |
| 1. Metabolism | 1.7 Glycan biosynthesis and metabolism           | Glycosphingolipid biosynthesis - globo and isoglobo series | ko00603 | 5            | 6                 | 0.007243 | 0.226508 |
| 1. Metabolism | 1.6 Metabolism of other amino acids              | Taurine and hypotaurine metabolism                         | ko00430 | 5            | 6                 | 0.007243 | 0.207632 |
| 1. Metabolism | 1.11 Xenobiotics biodegradation and metabolism   | Drug metabolism - cytochrome P450                          | ko00982 | 7            | 11                | 0.013102 | 0.346709 |

|                                   |                                                  |                                              |         |              |                   |          |          |
|-----------------------------------|--------------------------------------------------|----------------------------------------------|---------|--------------|-------------------|----------|----------|
| 4. Cellular Processes             | 4.1 Transport and catabolism                     | Lysosome                                     | ko04142 | 19           | 43                | 0.013619 | 0.334632 |
| 1. Metabolism                     | 1.0 Global and overview maps                     | Degradation of aromatic compounds            | ko01220 | 13           | 27                | 0.017529 | 0.402008 |
| 1. Metabolism                     | 1.1 Carbohydrate metabolism                      | Glyoxylate and dicarboxylate metabolism      | ko00630 | 12           | 25                | 0.022781 | 0.4898   |
| 1. Metabolism                     | 1.6 Metabolism of other amino acids              | Glutathione metabolism                       | ko00480 | 12           | 25                | 0.022781 | 0.460988 |
| 1. Metabolism                     | 1.10 Biosynthesis of other secondary metabolites | Isoquinoline alkaloid biosynthesis           | ko00950 | 9            | 17                | 0.023081 | 0.441105 |
| 1. Metabolism                     | 1.10 Biosynthesis of other secondary metabolites | Betalain biosynthesis                        | ko00965 | 6            | 10                | 0.031241 | 0.565622 |
| 1. Metabolism                     | 1.1 Carbohydrate metabolism                      | Propanoate metabolism                        | ko00640 | 8            | 16                | 0.046297 | 0.796312 |
| 1. Metabolism                     | 1.0 Global and overview maps                     | Microbial metabolism in diverse environments | ko01120 | 61           | 190               | 0.088552 | 0.923083 |
| 5. Organismal Systems             | 5.8 Development and regeneration                 | Axon regeneration                            | ko04361 | 7            | 15                | 0.08857  | 0.896118 |
| 1. Metabolism                     | 1.4 Nucleotide metabolism                        | Purine metabolism                            | ko00230 | 14           | 36                | 0.091663 | 0.900914 |
| <b>M-F VS P-S</b>                 |                                                  |                                              |         |              |                   |          |          |
| layer1                            | layer2                                           | layer3                                       | ID      | Input.number | Background.number | pvalue   | FDR      |
| 2. Genetic Information Processing | 2.2 Translation                                  | Ribosome                                     | ko03010 | 77           | 91                | 8.16E-23 | 2.81E-20 |
| 1. Metabolism                     | 1.2 Energy metabolism                            | Oxidative phosphorylation                    | ko00190 | 43           | 58                | 9.70E-10 | 1.67E-07 |
| 2. Genetic Information Processing | 2.3 Folding, sorting and degradation             | Proteasome                                   | ko03050 | 23           | 32                | 2.00E-05 | 0.001379 |

|                                   |                               |                                             |         |     |     |          |          |
|-----------------------------------|-------------------------------|---------------------------------------------|---------|-----|-----|----------|----------|
| 5. Organismal Systems             | 5.10 Environmental adaptation | Thermogenesis                               | ko04714 | 45  | 81  | 9.54E-05 | 0.004104 |
| 2. Genetic Information Processing | 2.4 Replication and repair    | DNA replication                             | ko03030 | 23  | 38  | 0.001019 | 0.035065 |
| 1. Metabolism                     | 1.1 Carbohydrate metabolism   | Amino sugar and nucleotide sugar metabolism | ko00520 | 31  | 56  | 0.001228 | 0.038402 |
| 2. Genetic Information Processing | 2.4 Replication and repair    | Homologous recombination                    | ko03440 | 15  | 22  | 0.001422 | 0.040757 |
| 1. Metabolism                     | 1.3 Lipid metabolism          | Biosynthesis of unsaturated fatty acids     | ko01040 | 8   | 10  | 0.004572 | 0.120971 |
| 1. Metabolism                     | 1.0 Global and overview maps  | Metabolic pathways                          | ko01100 | 333 | 857 | 0.004691 | 0.115264 |
| 4. Cellular Processes             | 4.2 Cell growth and death     | Meiosis - yeast                             | ko04113 | 35  | 72  | 0.010386 | 0.223306 |
| 1. Metabolism                     | 1.3 Lipid metabolism          | Steroid biosynthesis                        | ko00100 | 11  | 17  | 0.011297 | 0.228606 |
| 1. Metabolism                     | 1.0 Global and overview maps  | Fatty acid metabolism                       | ko01212 | 15  | 26  | 0.01387  | 0.265066 |
| 1. Metabolism                     | 1.0 Global and overview maps  | Carbon metabolism                           | ko01200 | 49  | 108 | 0.014032 | 0.254054 |
| 5. Organismal Systems             | 5.6 Nervous system            | Retrograde endocannabinoid signaling        | ko04723 | 14  | 24  | 0.015283 | 0.262864 |
| 1. Metabolism                     | 1.1 Carbohydrate metabolism   | Glyoxylate and dicarboxylate metabolism     | ko00630 | 14  | 25  | 0.023792 | 0.389731 |
| 1. Metabolism                     | 1.1 Carbohydrate metabolism   | Citrate cycle (TCA cycle)                   | ko00020 | 15  | 28  | 0.031449 | 0.491749 |
| 2. Genetic Information Processing | 2.4 Replication and repair    | Mismatch repair                             | ko03430 | 13  | 24  | 0.039799 | 0.595252 |



|                                   |                                                  |                                                            |         |              |                   |          |          |
|-----------------------------------|--------------------------------------------------|------------------------------------------------------------|---------|--------------|-------------------|----------|----------|
| 1. Metabolism                     | 1.10 Biosynthesis of other secondary metabolites | Aflatoxin biosynthesis                                     | ko00254 | 3            | 3                 | 0.041977 | 0.601674 |
| 1. Metabolism                     | 1.1 Carbohydrate metabolism                      | Pyruvate metabolism                                        | ko00620 | 19           | 40                | 0.065217 | 0.89738  |
| <b>M-F VS G-S</b>                 |                                                  |                                                            |         |              |                   |          |          |
| layer1                            | layer2                                           | layer3                                                     | ID      | Input.number | Background.number | pvalue   | FDR      |
| 2. Genetic Information Processing | 2.4 Replication and repair                       | DNA replication                                            | ko03030 | 27           | 38                | 3.38E-07 | 0.000117 |
| 1. Metabolism                     | 1.0 Global and overview maps                     | Metabolic pathways                                         | ko01100 | 316          | 857               | 2.62E-05 | 0.004518 |
| 2. Genetic Information Processing | 2.4 Replication and repair                       | Homologous recombination                                   | ko03440 | 16           | 22                | 5.88E-05 | 0.006759 |
| 2. Genetic Information Processing | 2.4 Replication and repair                       | Mismatch repair                                            | ko03430 | 16           | 24                | 0.000296 | 0.025558 |
| 1. Metabolism                     | 1.7 Glycan biosynthesis and metabolism           | Glycosphingolipid biosynthesis - globo and isoglobo series | ko00603 | 6            | 6                 | 0.000831 | 0.057326 |
| 4. Cellular Processes             | 4.2 Cell growth and death                        | Meiosis - yeast                                            | ko04113 | 35           | 72                | 0.001038 | 0.059689 |
| 1. Metabolism                     | 1.1 Carbohydrate metabolism                      | Amino sugar and nucleotide sugar metabolism                | ko00520 | 28           | 56                | 0.001882 | 0.092742 |
| 2. Genetic Information Processing | 2.4 Replication and repair                       | Base excision repair                                       | ko03410 | 15           | 25                | 0.002251 | 0.097073 |

|                                   |                                                |                                                     |         |    |     |          |          |
|-----------------------------------|------------------------------------------------|-----------------------------------------------------|---------|----|-----|----------|----------|
| 1. Metabolism                     | 1.0 Global and overview maps                   | Microbial metabolism in diverse environments        | ko01120 | 77 | 190 | 0.002281 | 0.087453 |
| 1. Metabolism                     | 1.1 Carbohydrate metabolism                    | Starch and sucrose metabolism                       | ko00500 | 27 | 55  | 0.00315  | 0.108669 |
| 1. Metabolism                     | 1.8 Metabolism of cofactors and vitamins       | Ubiquinone and other terpenoid-quinone biosynthesis | ko00130 | 6  | 7   | 0.004289 | 0.134509 |
| 1. Metabolism                     | 1.11 Xenobiotics biodegradation and metabolism | Metabolism of xenobiotics by cytochrome P450        | ko00980 | 10 | 15  | 0.004352 | 0.125131 |
| 1. Metabolism                     | 1.11 Xenobiotics biodegradation and metabolism | Aminobenzoate degradation                           | ko00627 | 10 | 15  | 0.004352 | 0.115505 |
| 1. Metabolism                     | 1.1 Carbohydrate metabolism                    | Ascorbate and aldarate metabolism                   | ko00053 | 9  | 13  | 0.004743 | 0.116886 |
| 1. Metabolism                     | 1.6 Metabolism of other amino acids            | Glutathione metabolism                              | ko00480 | 14 | 25  | 0.007389 | 0.169946 |
| 1. Metabolism                     | 1.6 Metabolism of other amino acids            | Cyanoamino acid metabolism                          | ko00460 | 10 | 16  | 0.008433 | 0.181845 |
| 4. Cellular Processes             | 4.1 Transport and catabolism                   | Lysosome                                            | ko04142 | 21 | 43  | 0.009401 | 0.190778 |
| 2. Genetic Information Processing | 2.4 Replication and repair                     | Non-homologous end-joining                          | ko03450 | 7  | 10  | 0.012057 | 0.218929 |
| 1. Metabolism                     | 1.6 Metabolism of other amino acids            | Taurine and hypotaurine metabolism                  | ko00430 | 5  | 6   | 0.012115 | 0.208978 |
| 1. Metabolism                     | 1.11 Xenobiotics biodegradation and metabolism | Naphthalene degradation                             | ko00626 | 11 | 19  | 0.012533 | 0.205892 |

**Supplementary Table S4** Primers for qRT–PCR validation.

| Gene Name                                           | Gene ID    | Primer-F             | Primer-R             |
|-----------------------------------------------------|------------|----------------------|----------------------|
| GH7 (Exoglucanase)                                  | DQGG002368 | CCAACAGGTACGACTCCGTC | CCATACCCTGGTCAGTGCAG |
| GH11 (endo-1,4-beta-xylanase)                       | DQGG004511 | ATGGGAGCAGGTCAACAGTG | ATAGCTTGAGCACTGCCTGG |
| CE1 (acetyl xylan esterase)                         | DQGG010182 | CCTCGTTCGCTCTGGGTATC | CGCCAAAACGTTGGTCCAT  |
| CE5 (acetylxylan esterase protein)                  | DQGG000985 | GAGGCTATCAACTACCCCGC | CGCGTCGTCCATGATTTGAC |
| CBM5 (carbohydrate-binding module family 5 protein) | DQGG006344 | GGACGGCTAAATGGTGGTCA | TGCGGACGGATGTTGTGTTA |
| AA9-1 (Auxilliary Activities Family 9)              | DQGG009829 | CTGGACCTCCACCATCCCTA | GAGCTCAGCTGAAGTGGGTT |
| AA9-2 (glycoside hydrolase family 61 protein)       | DQGG009624 | CGAAGCCTACCACTTCGTCA | TGGGCACATGTTGTAGGTCC |
| GT2 (glycosyltransferase family 2 protein)          | DQGG006597 | TCCGCATGATCGTTCTCCAG | GTTGCTGACGAGACGAGGAA |
| PL14 (polysaccharide lyase family 14 protein)       | DQGG010936 | GTGTCGATTTGACCACTGCG | CTGTCGCCTCCGTAGAATCC |
| Heat shock protein 60                               | DQGG011020 | TGTGAAACTGTTGGGTGCCT | TCCGAAAGTTTGGCGATCCA |
| HSP90-domain-containing protein                     | DQGG001016 | GCGAGACACTGCAATCGAAC | ACCGAGCCGAAAGTCTCTTG |
| Carbonic anhydrase1 (CA-1)                          | DQGG004716 | ACCTCTCAGCTCGTGAAAGC | CGACGAGAGCACGATAACCA |
| Carbonic anhydrase 2 (CA-2)                         | DQGG008753 | GCGCAACAAGCTTAAGGGTC | AATAGGGCCACCTTCAGCAC |
| cAMP-dependent protein kinase PKA1                  | DQGG004293 | ATCAAAACCTTCCGTCGCCT | GATAAGTCCCCTTTGGCCGT |
| cAMP-dependent protein kinase PKA2                  | DQGG007322 | AGCCCAAAGTGCTCGTACTC | CCCCTGGACGGTCATCAAAA |

|                            |            |                      |                      |
|----------------------------|------------|----------------------|----------------------|
| Transcriptional factor Myb | DQGG003605 | CCGCAATTGATCGAACCACC | TGTACGGCCGGGAAAGTAAG |
| Transcription factor steA  | DQGG001965 | CTCTGGCCAAGTCGATACCC | GTAGTTGCCCTGAGCATCGT |
| 18s                        | DQGG007047 | TTGAACTTCGTGGAGTCGGG | TTAAACCGTACCCAGGCGAC |
